# Supplementary material
Source: PubMed Central journal article supplement (PMC5997389)

# Supplementary Figure S1

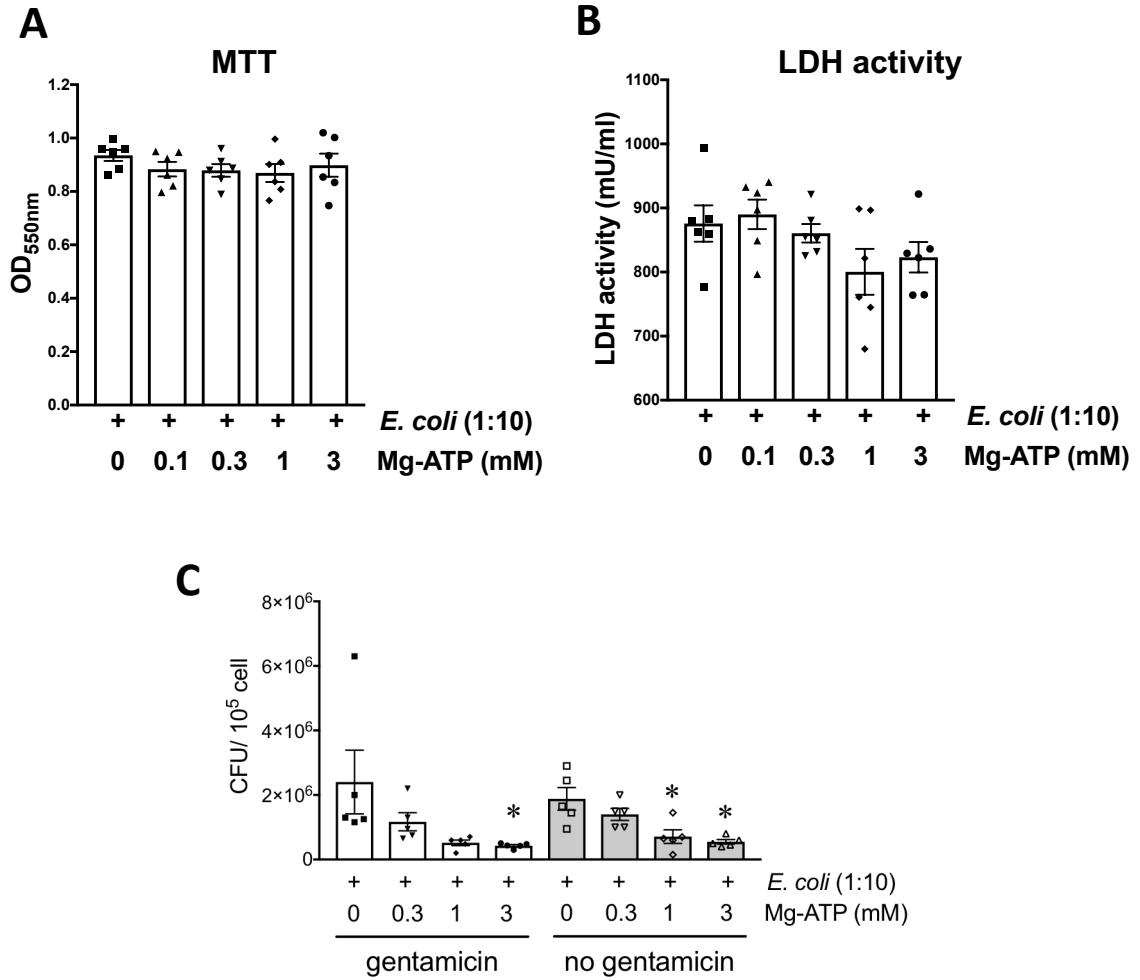

## Supplementary Figure S2

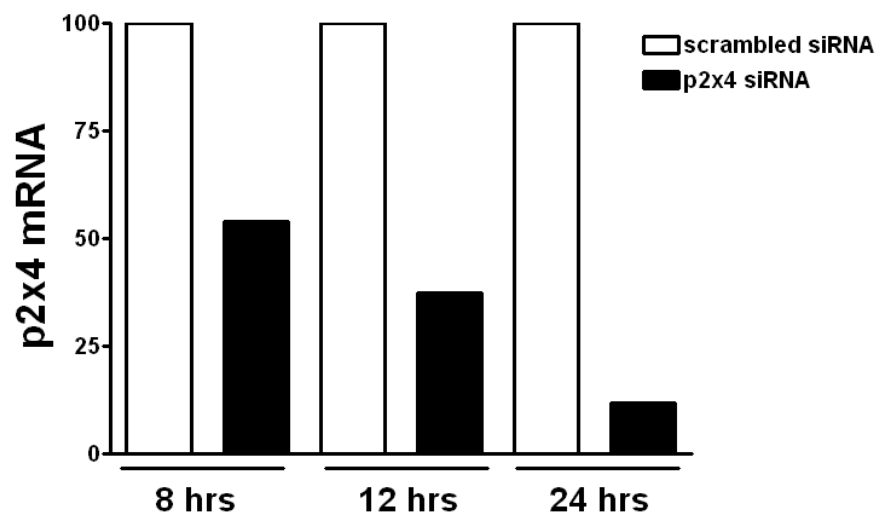

# Supplementary Figure S3

**A**

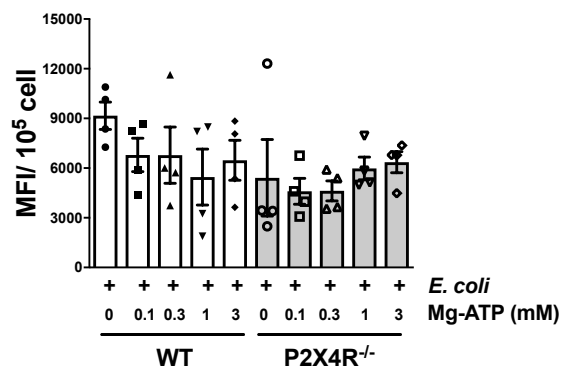

**B**

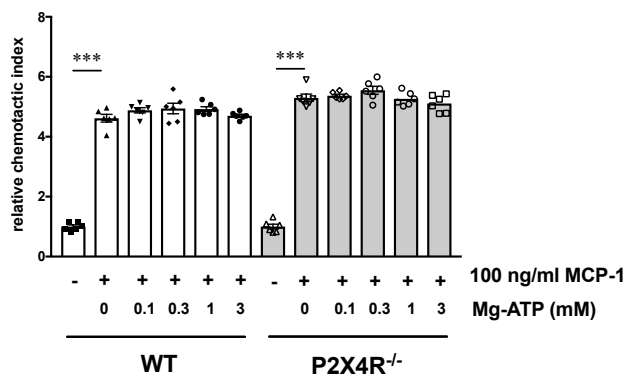

# Supplementary Figure S4

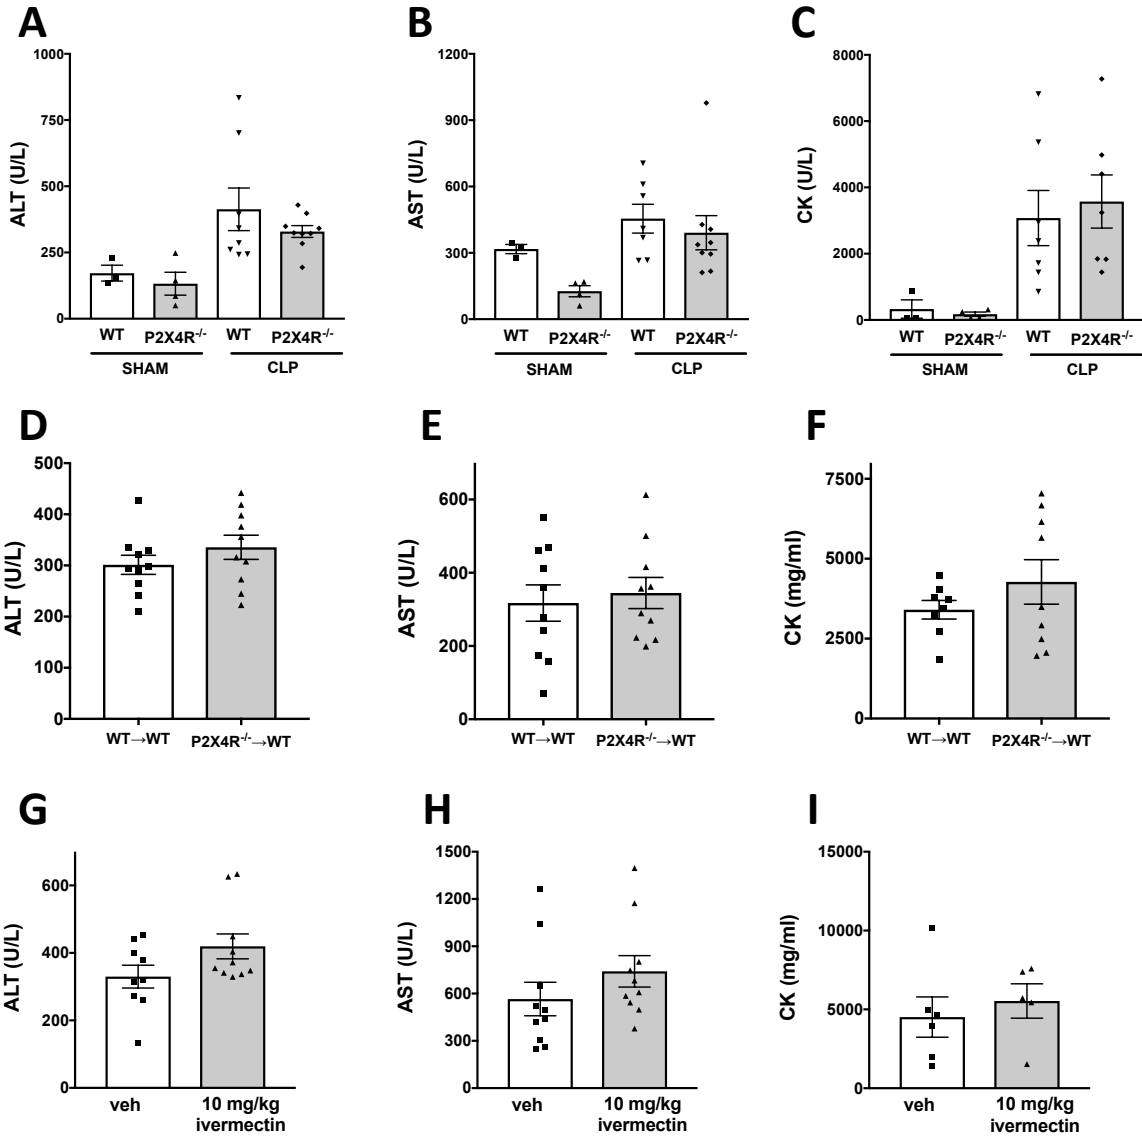

# Supplementary Figure S5

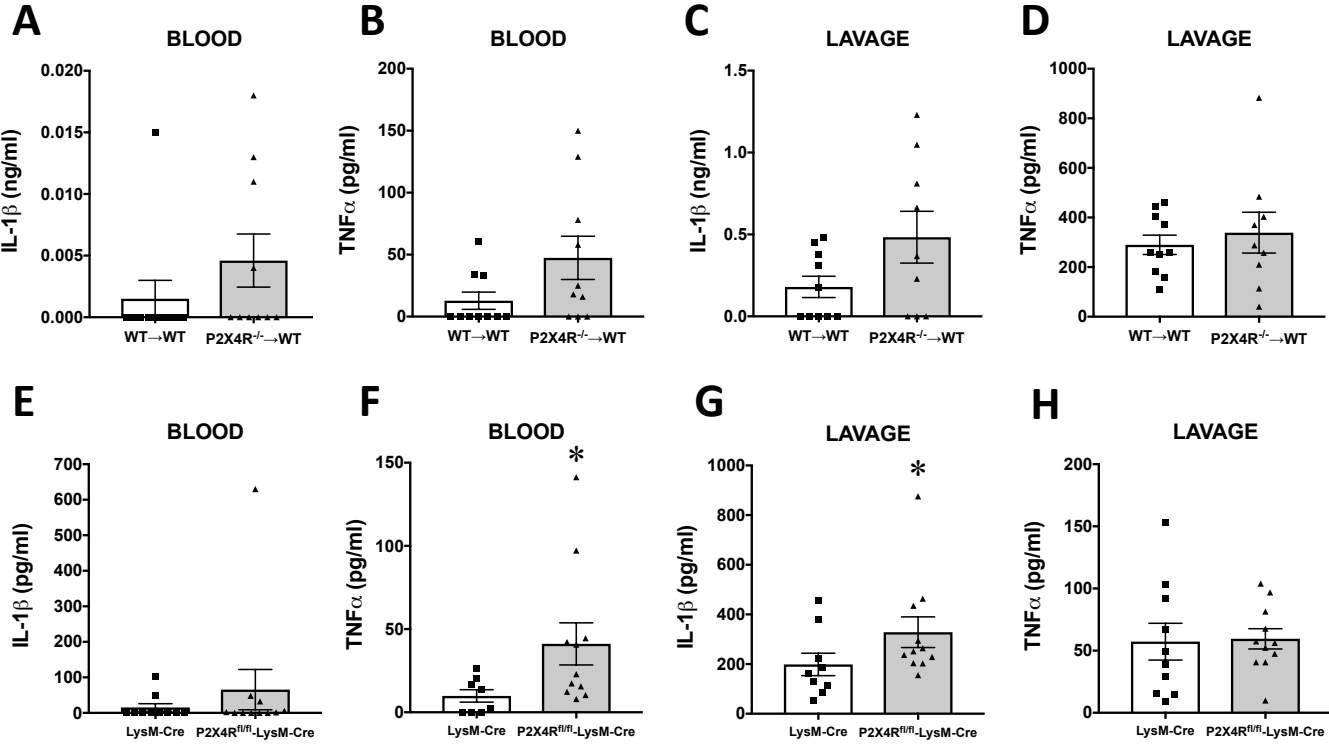

# Supplementary Figure S6

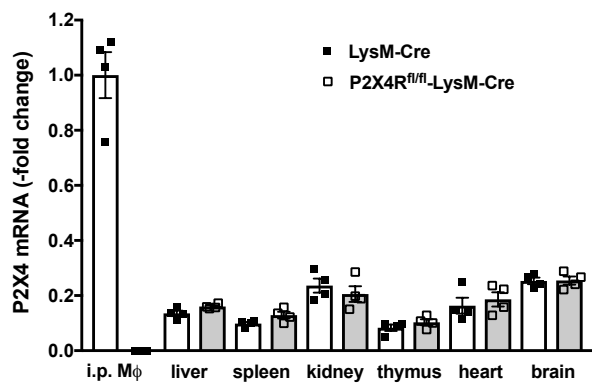

# Supplementary Figure S7

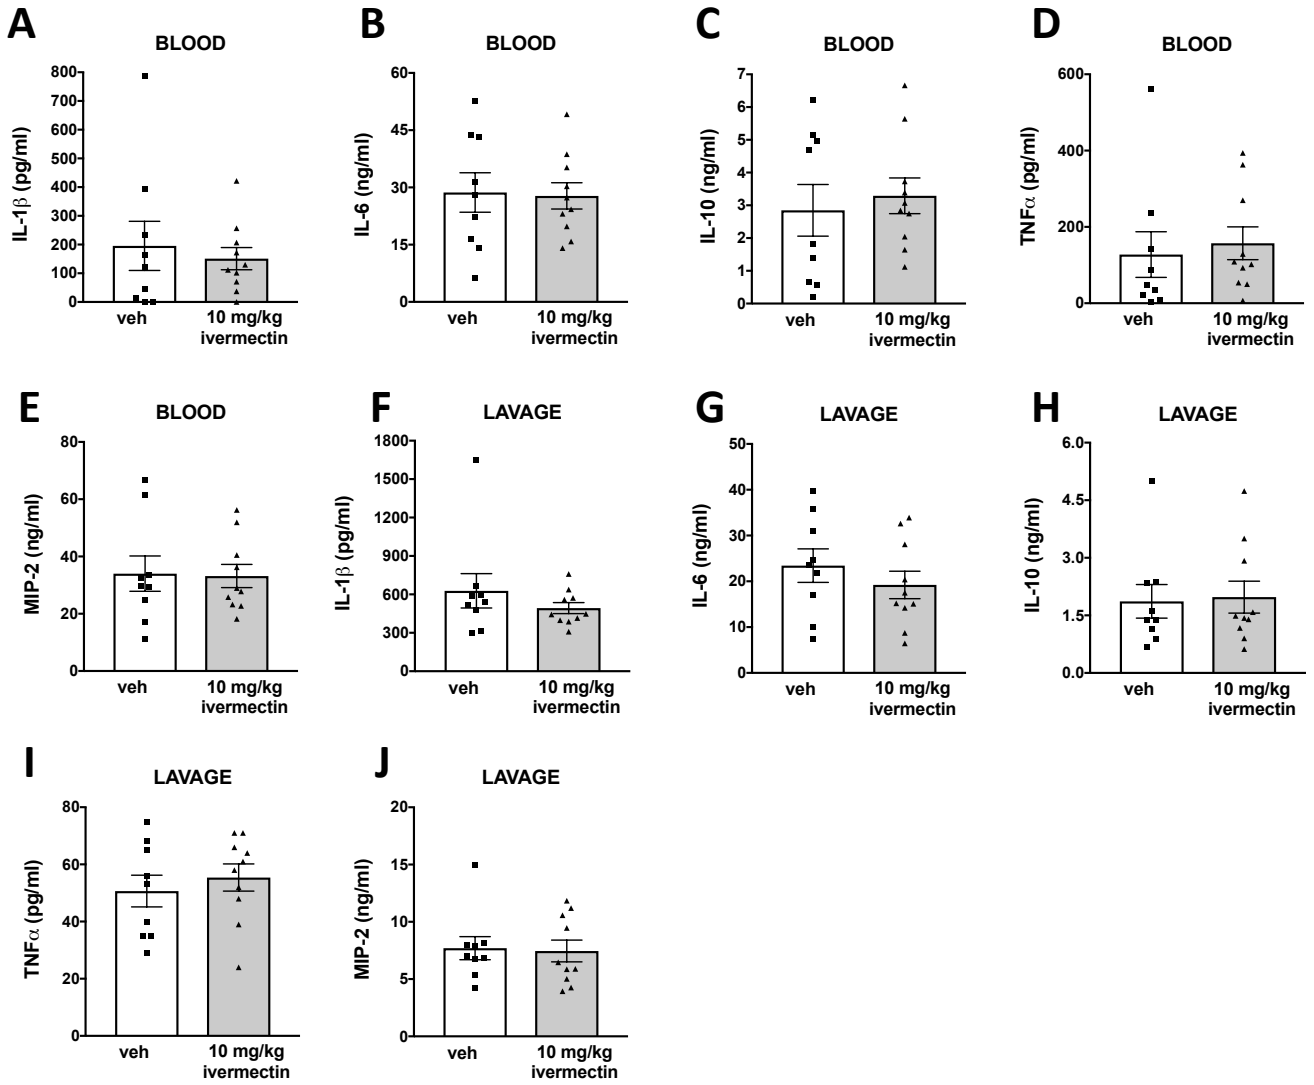

# Supplementary Figure S8

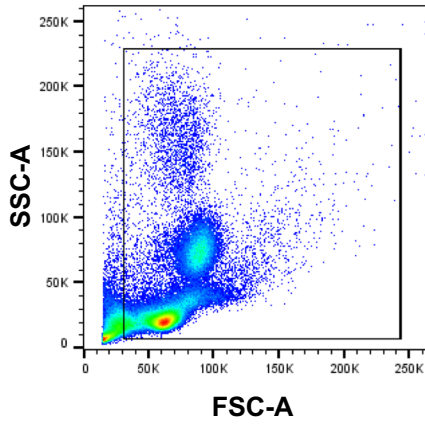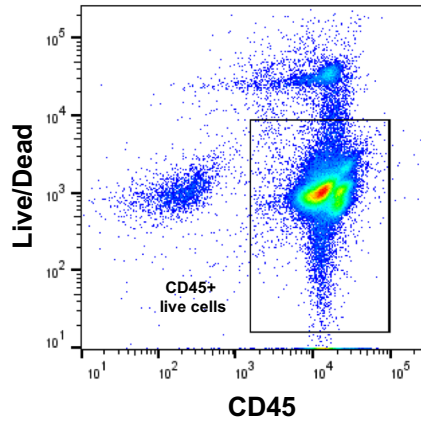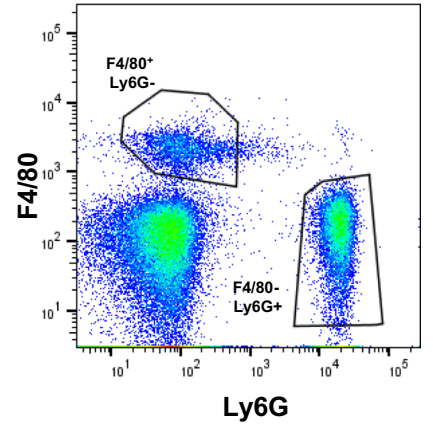

Supplement: jciinsight-3-99431-s163.pdf [file jciinsight-3-99431-s163.pdf]
